# Supplementary material for: Retinal-image quality and contrast sensitivity function in eyes with epiretinal membrane: a cross-sectional observational clinical study
Source: BMC Ophthalmol. 2018 Nov 7;18:290. doi: 10.1186/s12886-018-0957-1 (PMC6223062; doi:10.1186/s12886-018-0957-1)
Supplement: Supplementary file 1 — Raw data. (XLSX 21 kb) [file 12886_2018_957_MOESM1_ESM.xlsx]

## Sheet: Sheet1
No.	name	gender	ERM eyes																		The fellow eyes
			eye side	Stage of ERM	LOCS III				Operation eye Spherical error	Operation eye Cylinder error	SER	BCVA	OSI	Strehl ratio	Operation eye CS-1.5	Operation eye CS-3	Operation eye CS-6	Operation eye CS-12	Operation eye CS-18	Operation eye CS	eye side	LOCS III				Operation eye Spherical error	Operation eye Cylinder error	SER	BCVA	OSI	Strehl ratio	Operation eye CS-1.5	Operation eye CS-3	Operation eye CS-6	Operation eye CS-12	Operation eye CS-18	Operation eye CS
					NC	NO	C	P														NC	NO	C	P
1	XXX	F	OD	3	2.5	2	0	0	-0.5	0.5	-0.25	0.34	3.46	0.08	25	47	50	0	0	122	OS	3	2	1	0	-0.5	0.75	-0.13	0	0.28	0.22	36	87	78	55	0	256
2	XXX	F	OD	3	3	3	2.2	0	-2	2.5	-0.75	0.52	5.04	0.06	20	18	26	10	0	74	OS	3	2	2	0	-1.25	1.5	-0.5	-0.1	2.69	0.11	50	57	64	15	4	190
3	XXX	M	OD	3	2.5	2	1.5	0	-1.25	0.75	-0.88	0.94	8.1	0.06	15	0	0	0	0	15	OS	2	2.5	2	0	1.25	0.5	1.5	0.12	3.62	0.1	25	10	0	0	0	35
4	XXX	M	OD	3	2.5	3	1	0	0	1	0.5	0.26	1.34	0.17	56	79	60	15	7	217	OS	3	3	1.5	0	-0.5	1.25	0.13	0	0.46	0.21	71	146	78	30	17	342
5	XXX	F	OD	3	3	4	1	0	-0.5	0.75	-0.13	0.5	2.69	0.08	12	10	25	0	0	47	OS	2.5	4	1	0	0	-0.5	-0.25	0.68	0.94	0.18	18	20	45	0	0	83
6	XXX	M	OS	2	3	2	0	0	1.5	0.5	1.75	0.16	1.31	0.2	60	90	33	0	0	183	OD	3	2.5	0	0	-1.5	-0.5	-1.75	-0.16	0.54	0.23	71	134	33	22	12	272
7	XXX	F	OD	3	4	3.5	3	1	0.5	0.75	0.88	0.3	1.58	0.1	46	25	20	10	0	101	OS	3.5	3	2	1	0.5	0.75	0.88	0.2	0.84	0.17	100	40	45	11	4	200
8	XXX	F	OS	2	3.5	3	1	1	-1.75	0.5	-1.5	0.06	1.45	0.2	50	37	30	8	0	125	OD	3.5	3	1	1	1.5	0.5	1.75	0.06	0.7	0.13	50	57	64	33	12	216
9	XXX	F	OS	2	1.5	1	0	0	0	1.25	0.63	0.68	0.69	0.13	45	50	75	15	0	185	OD	2	1.5	0.5	0	0	0.75	0.38	-0.08	0.52	0.25	71	57	128	30	17	303
10	XXX	F	OS	2	1.5	2	2.5	0	-0.25	-0.5	-0.5	0.4	0.88	0.09	18	20	34	23	0	95	OD	2	2.5	2	0	0	-0.75	-0.38	-0.2	0.49	0.19	18	29	64	43	17	171
11	XXX	F	OS	2	2.5	3	0	0	0.75	0.75	1.13	0.72	2.21	0.14	45	77	55	22	8	207	OD	2	3	0	0	0.75	1	1.25	-0.04	1.73	0.12	71	80	128	43	12	334
12	XXX	F	OS	3	3	2.5	0	0	0	0.5	0.25	0.42	1.92	0.1	36	47	30	0	0	113	OD	3.5	2	0	0	0.5	0.5	0.75	0.1	1.58	0.12	36	57	64	15	6	178
13	XXX	F	OS	3	4	3.5	0	0	0.75	0.75	1.13	0.38	1.52	0.13	38	45	36	0	0	119	OD	3.5	3	0.5	0	0.5	0.5	0.75	-0.08	0.66	0.18	50	40	45	22	0	157
14	XXX	F	OD	3	3	2.5	0.5	0	-1.5	4	0.5	0.12	0.65	0.11	28	29	40	11	0	108	OS	2	2.5	0	0	-1	3.5	0.75	0	0.52	0.16	100	117	128	22	12	379
15	XXX	M	OD	2	3	2.5	0.5	0	0	1	0.5	0.14	2.39	0.18	63	80	50	10	0	203	OS	3.5	2.5	0.5	0	0	0.5	0.25	0.02	0.51	0.17	100	160	100	22	4	386
16	XXX	M	OS	2	3	2.5	2	0	-2.75	0	-2.75	0.18	5.88	0.18	71	69	74	22	8	244	OD	3	3	2	0	-3	0	-3	0.08	1.43	0.16	36	40	64	22	12	174
17	XXX	F	OS	2	2.5	3	0	0	0.5	1	1	0.04	1.36	0.13	60	37	23	11	0	131	OD	2	3.5	0	0	0.5	2	1.5	-0.04	0.91	0.19	50	57	90	30	12	239
18	XXX	M	OD	2	2.5	2	0	0	-2	1.5	-1.25	0.74	1.36	0.14	38	40	53	8	0	139	OS	2.5	2	0	0	-3	3	-1.5	-0.26	0.51	0.25	50	57	90	30	23	250
19	XXX	F	OS	3	3.5	3	1	0	0.25	0.5	0.5	0.4	2.3	0.22	100	100	68	0	0	268	OD	3	4	1.5	1	0.5	0.5	0.75	-0.1	1.22	0.14	71	134	88	40	12	345
20	XXX	F	OS	4	5	5.5	0	0	-1.25	-0.5	-1.5	0.7	7.32	0.07	18	20	18	0	0	56	OD	4	5	0	0	-1.25	-0.5	-1.5	0.24	6.56	0.07	50	29	45	0	0	124
21	XXX	F	OD	4	3.5	3	0.5	0	1.5	1	2	0.66	1.97	0.19	18	16	7	0	0	41	OS	4	2.5	0.5	0	-1.25	1.75	-0.38	0.06	0.49	0.24	36	40	64	11	0	151
22	XXX	F	OD	3	3.5	2.5	0	0	-0.25	0.5	0	0.52	2.94	0.07	24	33	40	8	0	105	OS	3.5	2.5	0	0	0	-1	-0.5	0	1.39	0.15	18	57	45	22	6	148
23	XXX	M	OS	3	3	2.5	0.2	0	0.5	1	1	0.24	1.43	0.14	36	29	45	8	0	118	OD	2.5	2.5	0.5	0	-0.75	1	-0.25	0	0.26	0.18	50	40	64	43	12	209
24	XXX	F	OS	4	3	2.5	0	0	0.75	0	0.75	0.62	4.61	0.15	18	12	7	0	0	37	OD	3	2.5	0	0	0.5	0.5	0.75	-0.1	0.77	0.12	71	120	78	30	12	311
25	XXX	M	OD	4	3.5	4	0	0	-0.5	0.75	-0.13	0.48	3.98	0.1	20	10	38	0	0	68	OS	3	3.5	0	0	-0.5	0	-0.5	0.12	2.23	0.09	25	10	64	0	0	99
26	XXX	F	OS	2	4	2.5	0.2	0	-1.25	0	-1.25	0.3	2.02	0.16	43	30	36	0	4	113	OD	3.5	2.5	0.2	0	-1.75	0.5	-1.5	0	0.41	0.18	25	57	64	30	4	180
27	XXX	M	OS	3	3.5	2.8	0.2	0	0.5	0.75	0.88	0.36	3.38	0.08	23	34	12	0	0	69	OD	4	3	0.5	0	0.25	0.75	0.63	-0.1	1.12	0.18	71	90	54	60	12	287
28	XXX	F	OD	4	3	2.5	0.5	0	1	0.5	1.25	0.6	7.38	0.06	9	10	26	0	0	45	OS	3.5	2.5	0.5	0	0	0.5	0.25	.	1.32	0.12	18	25	25	0	0	68
29	XXX	F	OD	2	3	2.5	0	0	0.5	2	1.5	0.66	2.85	0.13	28	90	40	0	0	158	OS	2.5	2.5	0	0	0.5	2	1.5	0	0.42	0.21	50	134	76	30	12	302
30	XXX	M	OD	4	3	2.5	1	0	-0.5	0.5	-0.25	0.8	3.2	0.2	18	10	0	0	0	28	OS	3	3	1.5	0	0	0	0	0.1	0.6	0.17	71	57	96	30	17	271
31	XXX	M	OD	3	3	2.8	0	0	0	-0.75	-0.38	0.66	1.3	0.06	29	55	32	0	0	116	OS	3.5	2.8	0	0	-2.5	-0.75	-2.88	0	0.67	0.17	71	97	88	43	12	311
32	XXX	M	OD	4	IOL	0	0	0	-0.5	-1.5	-1.25	1.2	4.19	0.09	9	0	0	0	0	9	OS	IOL	0	0	0	0	0	0	0.1	3.08	0.13	36	40	33	22	12	143
33	XXX	M	OD	4	IOL	0	0	0	0	0.5	0.25	0.72	5.37	0.09	18	10	0	0	0	28	OS	IOL	0	0	0	0	-0.5	-0.25	0	1.11	0.16	71	40	64	60	8	243
34	XXX	F	OS	4	3.5	2.5	1.5	0	-1.5	-0.5	-1.75	0.56	2.28	0.07	28	17	27	7	7	86	OD	3.5	3	1	0	0	-1	-0.5	0.02	0.59	0.23	36	57	64	60	17	234
35	XXX	M	OS	3	1	1.5	0.5	0	0.75	1.25	1.38	0.32	4.45	0.09	18	20	15	0	0	53	OD	1.5	1	0.5	0	0.75	0.5	1	-0.1	0.32	0.26	71	80	90	43	8	292
36	XXX	M	OS	4	2.5	3	3	0	-1.5	1.25	-0.88	0.9	1.19	0.06	9	0	0	0	0	9	OD	2.5	2	2	0	-2	1.75	-1.13	0.1	0.56	0.19	36	57	38	30	17	178
37	XXX	F	OS	3	3	3	0	0	0.75	1	1.25	0.34	4	0.11	50	25	24	5	4	108	OD	3	3	0	0	0.5	0.75	0.88	0	1.16	0.11	36	29	45	30	12	152
38	XXX	F	OS	3	3	2.5	0.5	0	0.5	0.5	0.75	0.12	1.94	0.19	38	40	44	0	0	122	OD	2.5	2	0.5	0	0	0.5	0.25	0	0.9	0.12	36	57	45	0	0	138
39	XXX	F	OS	3	2.5	2	0.5	0	-3.5	-1	-4	0.34	1.5	0.09	18	30	16	0	0	64	OD	2.5	2	0.5	0	-3.5	-1	-4	0.08	0.68	0.22	36	40	45	11	0	132
40	XXX	F	OS	4	3	2.5	0	0	1.5	0	1.5	0.9	5.57	0.05	9	10	0	0	0	19	OD	3	2	0	0	0	0.5	0.25	0	1.08	0.16	36	57	58	30	12	193
41	XXX	F	OS	3	2.5	3	0	0	0.5	0	0.5	-0.1	4.18	0.18	30	26	34	10	0	100	OD	3	2.5	1	0	0	0	0	-0.04	1.42	0.24	50	57	60	30	23	220
42	XXX	F	OS	3	2	1.5	0	0	1.5	0	1.5	0.84	3.56	0.07	12	17	8	0	0	37	OD	2	2	0	0	1	0.5	1.25	0	1.49	0.15	50	80	68	85	12	295
43	XXX	F	OD	3	3	3	0	0	0	0	0	0.8	3.38	0.1	19	15	8	0	0	42	OS	3	3	0	0	0	0.5	0.25	0.16	1.54	0.1	25	40	45	11	6	127
44	XXX	F	OD	4	2	2.5	2.2	0	-0.75	0.5	-0.5	0.66	5.64	0.07	20	16	5	0	0	41	OS	2	3	2	0	-1.25	1	-0.75	0.16	1.31	0.13	71	57	64	43	23	258
